# Supplementary material for: Distinct Calcium Binding and Structural Properties of Two Centrin Isoforms from Toxoplasma gondii
Source: MDPI journal article supplement (doi:10.3390/biom10081142), 2020-08-04
Supplement: s1 [file s1]

## Supplementary Material

### Distinct Calcium Binding and Structural Properties of Two Centrin Isoforms from *Toxoplasma gondii*

Luca Bombardi<sup>†</sup>, Marco Pedretti<sup>†</sup>, Carolina Conter, Paola Dominici and Alessandra Astegno\*

Department of Biotechnology, University of Verona, Strada Le Grazie 15, 37134 Verona, Italy.

<sup>†</sup>These authors contributed equally to the work.

\*Corresponding author: Alessandra Astegno, e-mail: [alessandra.astegno@univr.it](mailto:alessandra.astegno@univr.it) TEL +39 0458027955

**Supplementary Table S1.** List of mutagenic primers used to generate TgCEN1 and TgCEN2 variants. PF = Primer Forward, PR = Primer Reverse.

| Mutation       | Type of Primer | Primer Sequence                    |
|----------------|----------------|------------------------------------|
| TgCEN1-C       | PF             | CCACCACCACCACCACTTGACGGAAGAACAGC   |
|                | PR             | GGTGGTGGTGGTGGTGAAGTGCCTTCTTGTCG   |
| TgCEN2-C       | PF             | CCACCACCACCACCACCTAACAGAGGACGAAATC |
|                | PR             | GGTGGTGGTGGTGGTGGATTGTCTCCTGCTTTAG |
| G43A TgCEN1-C  | PF             | CACAGATGGGTCAGCCTGCATCGACGCAA      |
|                | PR             | TTGCGTCGATGCAGGCTGACCCATCTGTG      |
| G79A TgCEN1-C  | PF             | CAAGGATGGCACGGCAAGCGTTGACTTCC      |
|                | PR             | GGAAGTCAACGCTTGCCGTGCCATCCTTG      |
| G152A TgCEN1-C | PF             | CGGGACGGCGACGCGGAAATCAATGAAG       |
|                | PR             | CTTCATTGATTTCCGCGTCGCCGTCCCG       |
| G44A TgCEN2-C  | PF             | GACACAGACGGCAGTGCTATGATCGATCCGAAA  |
|                | PR             | TTTCGGATCGATCATAGCACTGCCGTCTGTGTC  |
| G153A TgCEN2-C | PF             | GACTCAAATGGCGACGCGGAGATTTCTTCGAG   |
|                | PR             | CTCGAAGGAAATCTCCGCGTCGCCATTTGAGTC  |

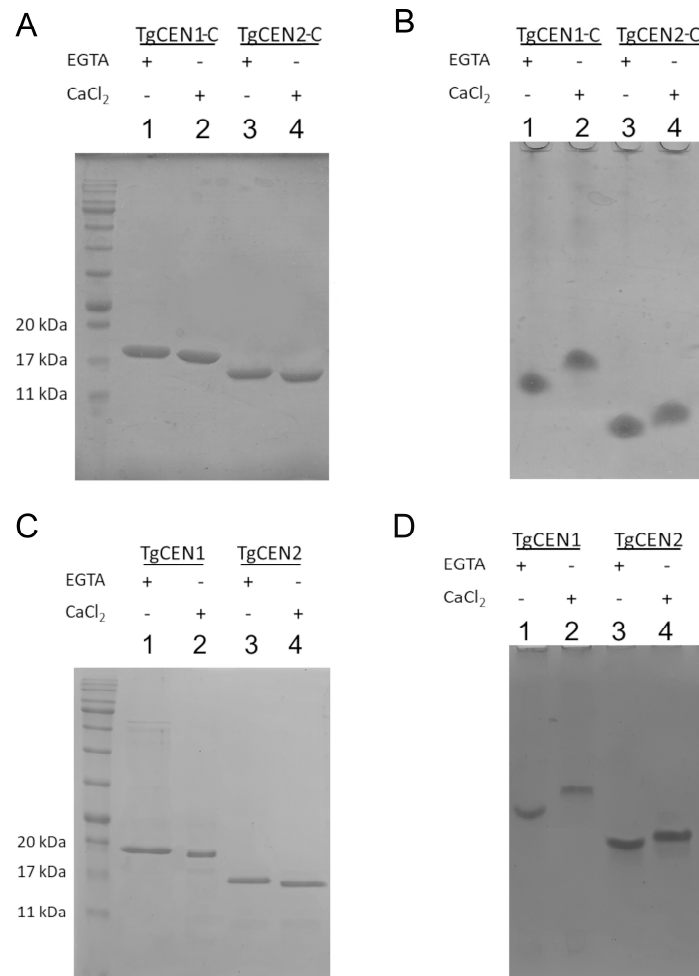

**Figure S1. SDS- and native-PAGE analysis of truncated (A, B) and full-length (C, D) variants of toxoplasma centrins.** The purified proteins were analyzed on 15% SDS-PAGE (A, C) and 12% native-PAGE (B, D) in the presence of 2 mM EGTA or 2 mM CaCl<sub>2</sub>.

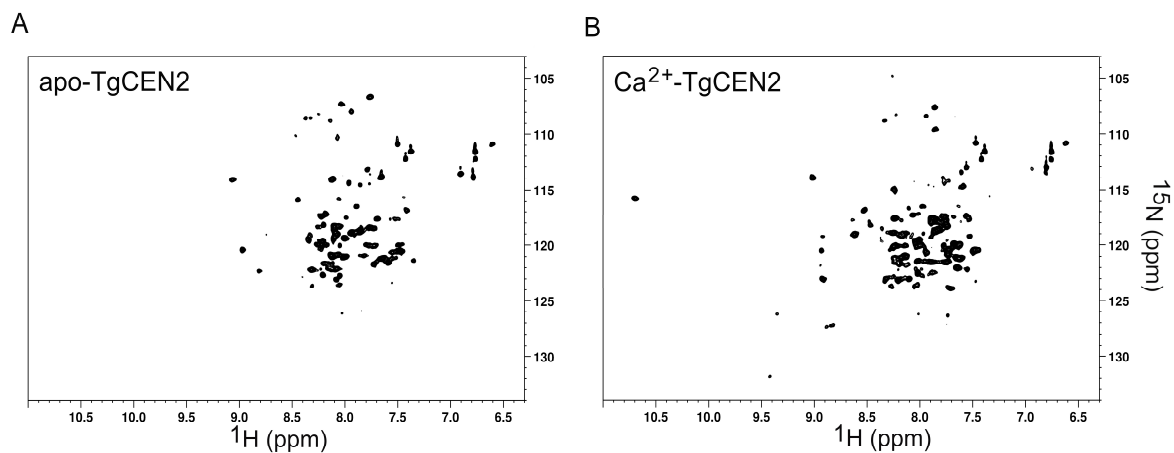

**Figure S2.**  $^1\text{H}$ - $^{15}\text{N}$  HSQC NMR spectra of full-length TgCEN2. The apo-condition was obtained by adding 5 mM EGTA (A), while the  $\text{Ca}^{2+}$ -bound condition was obtained by adding 5 mM  $\text{CaCl}_2$  (B).

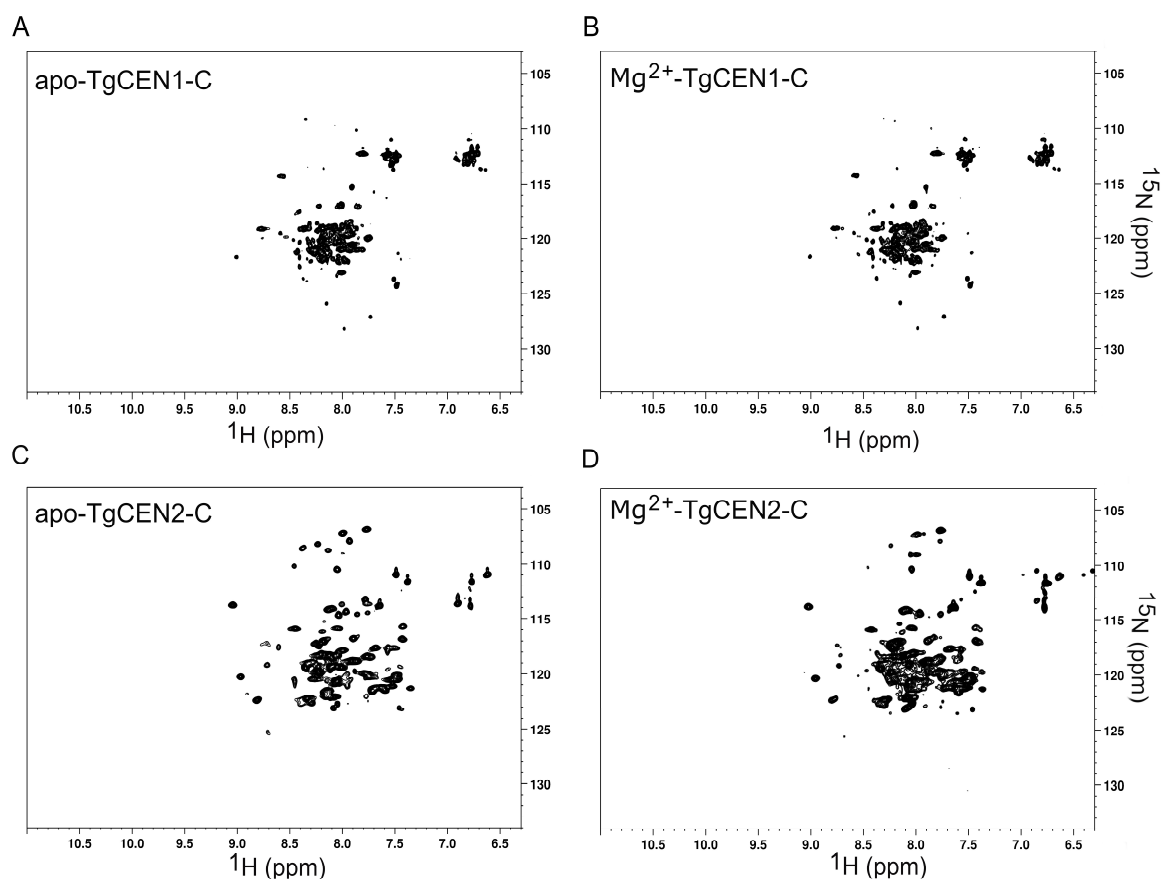

**Figure S3.**  $^1\text{H}$ - $^{15}\text{N}$  HSQC NMR spectra of TgCEN1-C and TgCEN2-C in the presence of  $\text{MgCl}_2$ . The apo-condition was obtained by adding 5 mM EGTA, while the  $\text{Mg}^{2+}$ -bound condition was obtained by adding 5 mM  $\text{MgCl}_2$ .

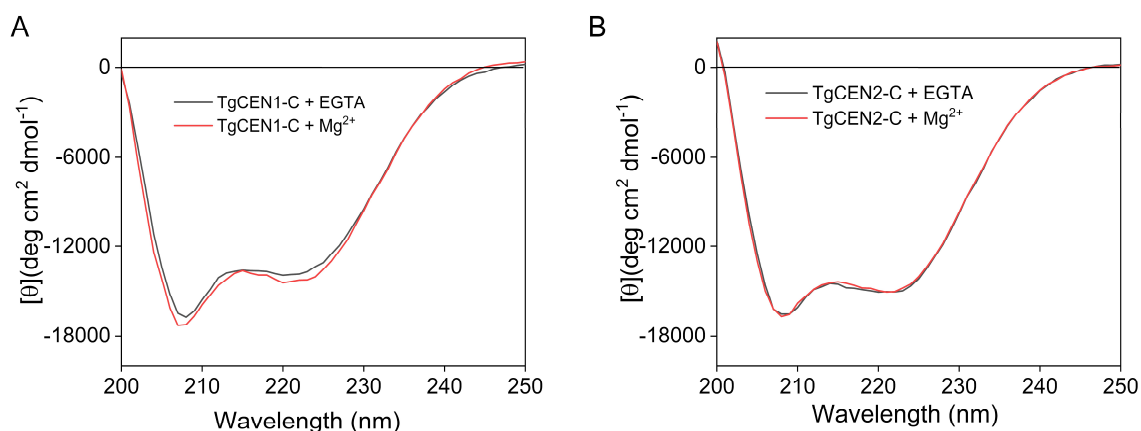

**Figure S4. Far-UV CD spectra of TgCEN1-C and TgCEN2-C in the presence of MgCl<sub>2</sub>.** Far-UV CD spectra of 0.2 mg/mL TgCEN1-C (A) and TgCEN2-C (B) in the presence of 2 mM EGTA (black) and 0.5 mM EGTA + 2 mM MgCl<sub>2</sub> (red).

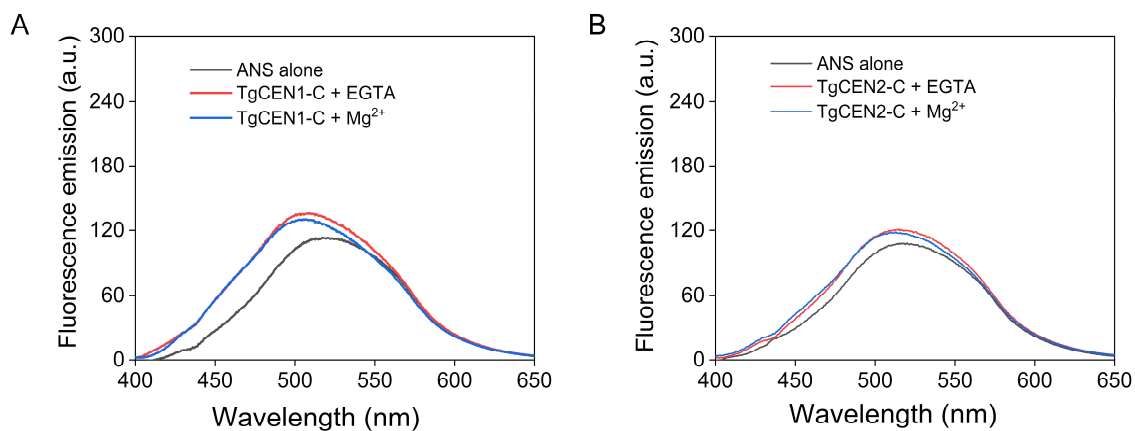

**Figure S5. Fluorescence emission of ANS in the presence of MgCl<sub>2</sub>.** Representative ANS fluorescence spectra of TgCEN1-C (A) and TgCEN2-C (B) in the presence of 2 mM EGTA (red) or 0.5 mM EGTA + 2 mM MgCl<sub>2</sub> (blue). The spectra of ANS alone (black) is also shown.



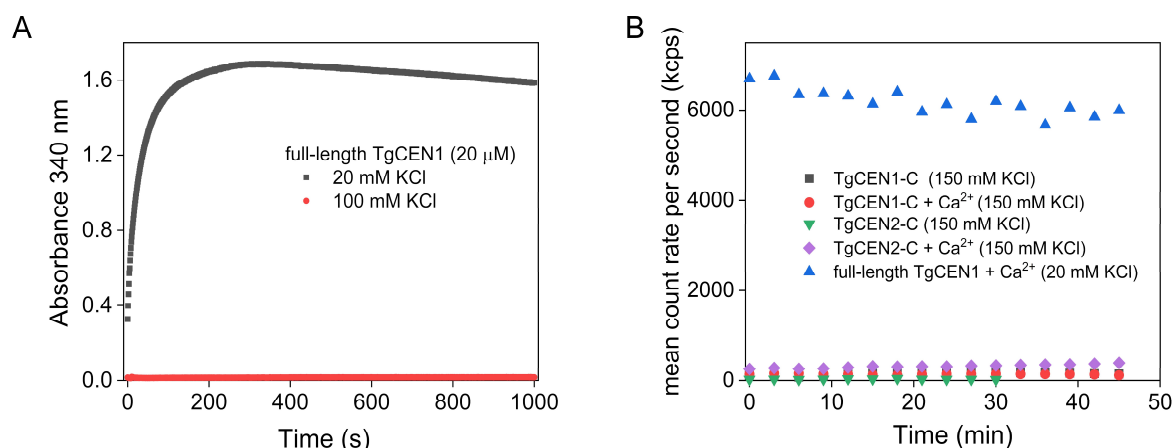

**Figure S6. Dependence on ionic strength of self-assembly process.** (A) Turbidity measurements of full-length TgCEN1 in 20 mM Tris-HCl pH 7.5 at low and high ionic strength. Scattering intensity at 340 nm was measured as a function of time at 37°C for the samples (20  $\mu$ M protein) upon addition of 1 mM  $\text{Ca}^{2+}$ . A dependence on ionic strength of the assembly process of full-length TgCEN1 was clearly observed. (B) Time-dependent changes of the total count rate (measured as kilocounts per second) of deleted variants TgCEN1-C and TgCEN2-C before and after addition of  $\text{Ca}^{2+}$  at high ionic strength (150 mM KCl) as used in ANS experiments. No self-assembly was observed. For comparison, the profile of full-length TgCEN1 that shows high aggregation propensity upon  $\text{Ca}^{2+}$  addition at low ionic strength (20 mM KCl) was reported.
